# Supplementary material for: Effect of water-soluble zinc porphyrin on the catalytic activity of fumarase for l-malate dehydration to fumarate
Source: Royal Society of Chemistry journal article supplement (doi:10.1039/d3nj02900j), 2023-01-01
Supplement: d3nj02900j1.pdf [file d3nj02900j1.pdf]

## Supporting information

### **Effect of water-soluble zinc porphyrin on the catalytic activity of fumarase for L-malate dehydration to fumarate**

Mika Takeuchi<sup>a</sup> and Yutaka Amao<sup>a,b\*</sup>

<sup>a</sup> Graduate School of Science, Osaka Metropolitan University, 3-3-138 Sugimoto, Sumiyoshi-ku, Osaka 558-8585, Japan

<sup>b</sup> Research Centre of Artificial Photosynthesis (ReCAP), Osaka Metropolitan University, 3-3-138 Sugimoto, Sumiyoshi-ku, Osaka 558-8585, Japan,

Email: amao@omu.ac.jp

## 1. Determination for fumarate concentration using ion chromatography

The concentration of fumarate was determined using ion chromatography system (Metrohm, Eco IC; electrical conductivity detector) with an ion exclusion column (Metrosep Organic Acids 250/7.8 Metrohm; column size: 7.8 x 250 mm; composed of 9  $\mu\text{m}$  polystyrene-divinylbenzene copolymer with sulfonic acid groups). The 1.0 mM perchloric acid and 50 mM lithium chloride in aqueous solution were used as an eluent and a regenerant, respectively. The retention time for fumarate was detected at 12.28–12.37 min. The electrical conductivity changes in the various sodium fumarate concentrations (0 – 1000  $\mu\text{M}$ ) during the ion chromatograph analysis were shown in Figure S1(a). Figure S1 (b) shows the relationship between the sodium fumarate concentration and the detection peak area using ion chromatograph.

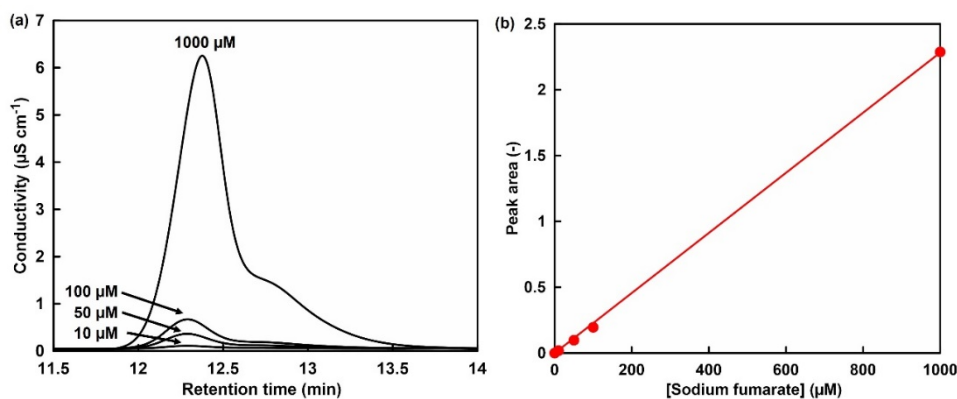

**Figure S1.** Chromatogram of sodium fumarate (0 – 1000  $\mu\text{M}$ ) in 50 mM-HEPES buffer (pH 7.0) (a). Relationship between the fumarate concentration and the detection peak area (b).

As shown in Figure S1(b), the fumarate concentration and the detected peak area showed a good linear relationship (correlation coefficient:  $r^2=0.999$ ) as following equation (S1).

$$\text{Peak area} = 2.28 \times 10^3 [\text{fumarate}] (\mu\text{M}) \quad (\text{S1})$$

## 2. Fumarate synthesis from L-malate with fumarase (FUM) in the presence of water-soluble zinc porphyrin

Figure S2 shows a chart of an ion chromatogram sampled from the reaction solution of L-malate (1.0 mM), FUM (0.5 units; 1.3 nM) and water-soluble zinc porphyrin (10  $\mu\text{M}$ ) in 5.0 mL of 500 mM HEPES buffer (pH 7.8) during the incubation. The following four zinc porphyrins were used for the experiment; zinc tetrakis(4-methylpyridyl)porphyrin ( $\text{ZnTMPyP}^{4+}$ ), zinc tetrakis(4-*N,N,N*-trimethylaminophenyl)porphyrin ( $\text{ZnTMAP}^{4+}$ ), zinc tetra(4-carboxyphenyl)porphyrin ( $\text{ZnTCPP}^{4+}$ ), zinc tetra(4-sulfonatophenyl)porphyrin ( $\text{ZnTPPS}^{4+}$ ).

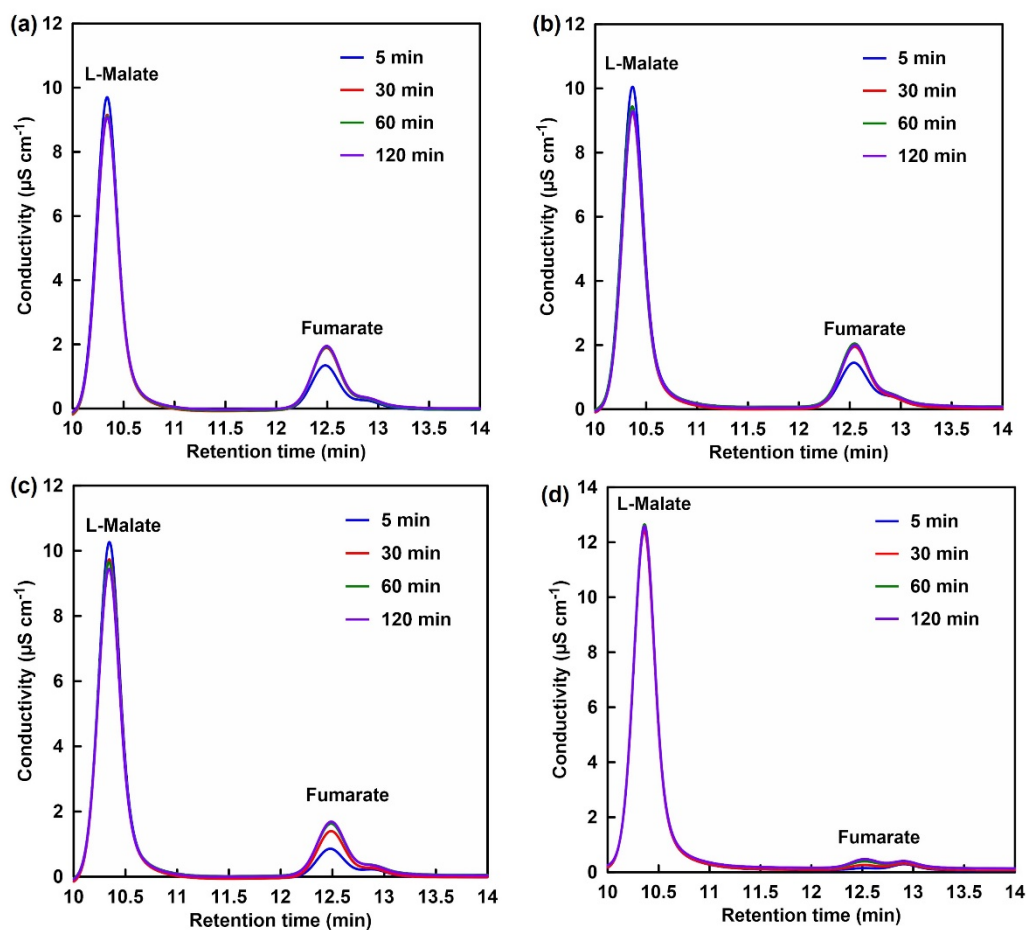

**Figure S2.** A chart of an ion chromatogram for L-malate or fumarate concentration in the solution of L-malate (1.0 mM), FUM (0.5 units; 1.3 nM) and water-soluble zinc porphyrin (10  $\mu\text{M}$ ) in 5.0 mL of 500 mM HEPES buffer (pH 7.8). (a):  $\text{ZnTMPyP}^{4+}$ , (b):  $\text{ZnTMAP}^{4+}$ , (c):  $\text{ZnTCPP}^{4+}$ , (d):  $\text{ZnTPPS}^{4+}$



### 3. Fumarate synthesis from L-malate with fumarase (FUM) in the presence of water-soluble metal-free porphyrin

Figure S3 shows a chart of an ion chromatogram sampled from the reaction solution of L-malate (1.0 mM), FUM (0.5 units; 1.3 nM) and water-soluble metal-free porphyrin (10  $\mu\text{M}$ ) in 5.0 mL of 500 mM HEPES buffer (pH 7.8) during the incubation. The following four zinc porphyrins were used for the experiment; tetrakis(4-methylpyridyl)porphyrin ( $\text{H}_2\text{TMPyP}^{4+}$ ), tetrakis(4-*N,N,N*-trimethylaminophenyl)porphyrin ( $\text{H}_2\text{TMAP}^{4+}$ ), tetra(4-carboxyphenyl)porphyrin ( $\text{H}_2\text{TCPP}^{4-}$ ), tetra(4-sulfonatophenyl)porphyrin ( $\text{H}_2\text{TPPS}^{4-}$ ).

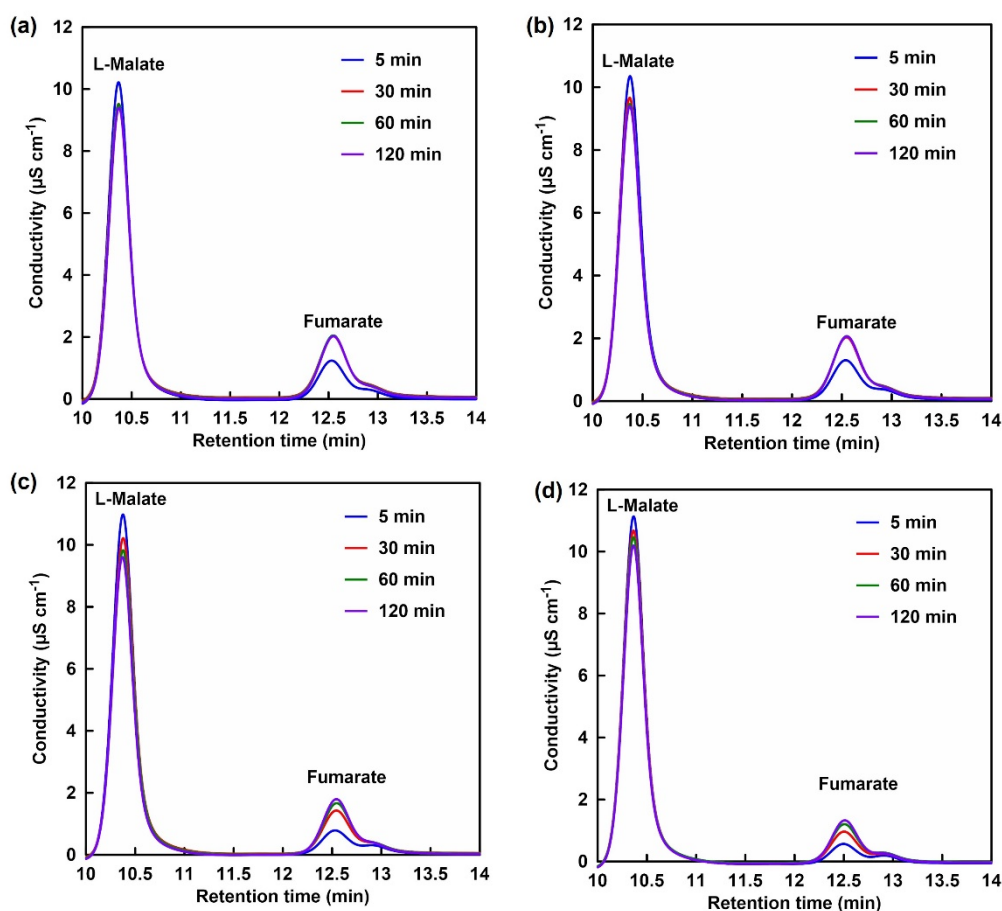

**Figure S3.** A chart of an ion chromatogram for L-malate or fumarate concentration in the solution of L-malate (1.0 mM), FUM (0.5 units; 1.3 nM) and water-soluble metal-free porphyrin (10  $\mu\text{M}$ ) in 5.0 mL of 500 mM HEPES buffer (pH 7.8). (a):  $\text{H}_2\text{TMPyP}^{4+}$ , (b):  $\text{H}_2\text{TMAP}^{4+}$ , (c):  $\text{H}_2\text{TCPP}^{4-}$ , (d):  $\text{H}_2\text{TPPS}^{4-}$
